# Supplementary material for: A sinteractive Ni–BaZr0.8Y0.2O3−δ composite membrane for hydrogen separation
Source: Royal Society of Chemistry journal article supplement (doi:10.1039/c3ta14777k), 2014-01-01
Supplement: c3ta14777k1.pdf [file c3ta14777k1.pdf]

## Supporting information

### A sinteractive Ni-BaZr<sub>0.8</sub>Y<sub>0.2</sub>O<sub>3-δ</sub> composite membrane for hydrogen separation

Shumin Fang,<sup>a</sup> Siwei Wang,<sup>a,b</sup> Kyle S. Brinkman,<sup>b</sup> Fanglin Chen<sup>\*a</sup>

<sup>a</sup> Department of Mechanical Engineering, University of South Carolina, Columbia, SC 29208, USA

<sup>b</sup> Department of Materials Science and Engineering, Clemson University, Clemson, SC 29634, USA

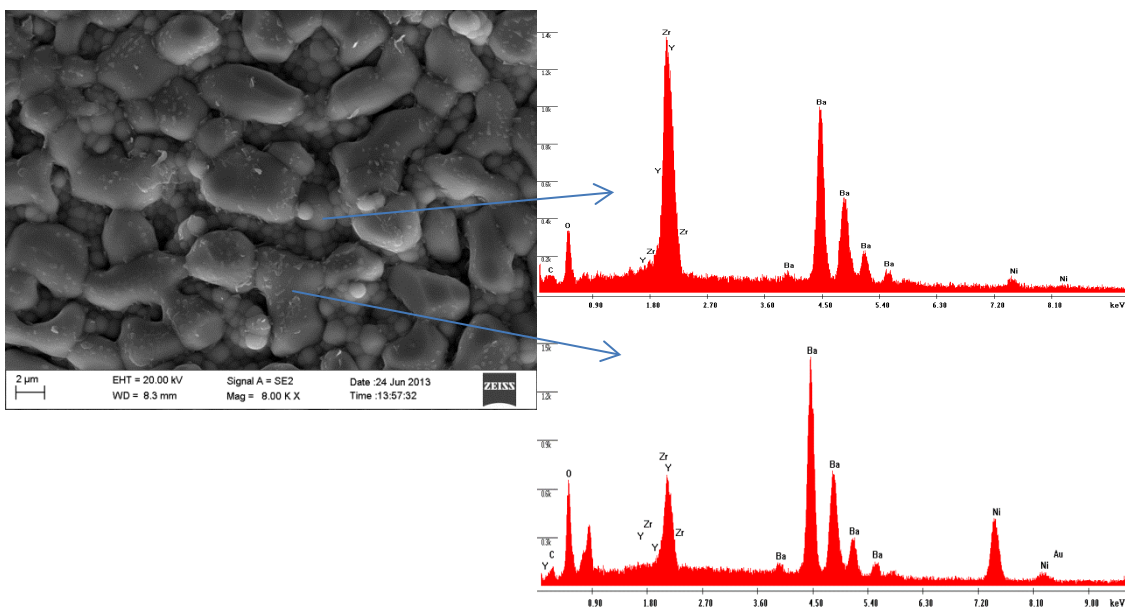

Fig .S1 Surface SEM image and EDX spectra of BZYNiO<sub>2</sub> pellet calcined at 1400°C for 10h.

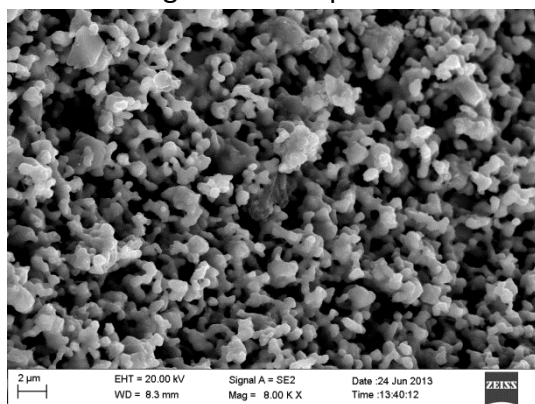

Fig. S2 Cross-section SEM image of BZYNiO<sub>2</sub> pellet calcined at 1300°C for 10h.

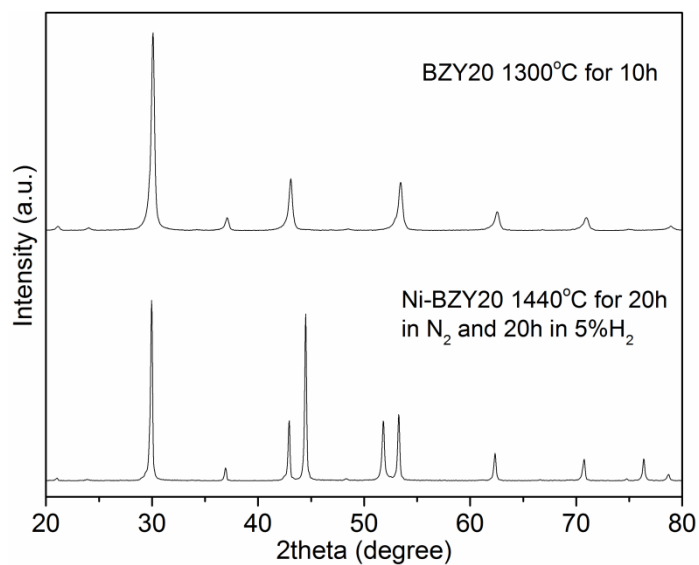

Fig. S3 XRD patterns of BZY20 prepared by solid state reaction method and Ni-BZY20 after treatment at 1300°C for 10h and 1440°C for 20h in N<sub>2</sub> and 20h in 5%H<sub>2</sub>, respectively. BaCO<sub>3</sub> can be seen at ~24°.
